# Supplementary material for: Predicting Cardiac Arrest in Children with Heart Disease: A Novel Machine Learning Algorithm
Source: MDPI journal article supplement (doi:10.3390/jcm12072728), 2023-04-06
Supplement: s1 [file s1]

Supplemental Table S1: Potential Study Features and Frequency Collected from Electronic Health Record

| Vital Signs                                   | Laboratory data                  | medications                                         | Ventilator settings                       | Echocardiogram parameters                                          | Other                   |
|-----------------------------------------------|----------------------------------|-----------------------------------------------------|-------------------------------------------|--------------------------------------------------------------------|-------------------------|
| Systolic blood pressure (hourly)              | Blood gas (variable)             | Vasoactive infusions (hourly)                       | Fraction of inspired oxygen (hourly)      | Systemic ventricle function (variable)                             | Urine output (variable) |
| Mean arterial blood pressure (hourly)         | Basic metabolic panel (variable) | Sedative/ neuromuscular blockade infusions (hourly) | Peak inspiratory pressure (hourly)        | Systemic ventricle atrioventricular valve regurgitation (variable) |                         |
| Diastolic blood pressure (hourly)             | Liver function panel (variable)  | Diuretics (variable)                                | Positive end expiratory pressure (hourly) | Subpulmonary ventricle function (variable)                         |                         |
| Heart rate (hourly)                           | Coagulation studies (variable)   | Antiarrhythmic infusions (hourly)                   | Mean airway pressure (hourly)             | Subpulmonary ventricle hypertension (variable)                     |                         |
| Central venous/intracardiac pressure (hourly) | Complete blood count (variable)  |                                                     | Tidal volume (hourly)                     | Tricuspid regurgitation (variable)                                 |                         |
| End tidal carbon dioxide level (hourly)       |                                  |                                                     |                                           | Pulmonary vein obstruction (variable)                              |                         |
| Oxygen saturation (hourly)                    |                                  |                                                     |                                           | Aortic insufficiency (variable)                                    |                         |
| Cerebral oximetry (hourly)                    |                                  |                                                     |                                           |                                                                    |                         |
| Somatic oximetry (hourly)                     |                                  |                                                     |                                           |                                                                    |                         |

Minimum frequency of variable collected in parenthesis
